# Supplementary material
Source: PubMed Central journal article supplement (PMC4268307)
Supplement: NIHMS634692-supplement-supplement_1.pdf [file NIHMS634692-supplement-supplement_1.pdf]

WEB APPENDIX A: VARIANCES AND COVARIANCES IN EQUATION 4 FOR A  
BALANCED DESIGN

$$\text{var}(A) = \frac{1}{Nm_z m_w \hat{\mu}_{101}^2} \begin{bmatrix} \hat{\mu}_{202} + (m_w - 1)\hat{\mu}_{2,0,11} + (m_z - 1)\hat{\mu}_{11,0,2} + (m_w - 1)(m_z - 1)\hat{\mu}_{11,0,11} \\ -m_w m_z \hat{\mu}_{101}^2 \end{bmatrix} \quad (\text{A.1})$$

$$\text{var}(B) = \frac{1}{Nm_x m_w \hat{\mu}_{011}^2} \begin{bmatrix} \hat{\mu}_{022} + (m_w - 1)\hat{\mu}_{0,2,11} + (m_x - 1)\hat{\mu}_{0,11,2} + (m_w - 1)(m_x - 1)\hat{\mu}_{0,11,11} \\ -m_x m_w \hat{\mu}_{011}^2 \end{bmatrix} \quad (\text{A.2})$$

$$\text{var}(C) = \frac{4}{N_2 m_w^2 (m_w - 1)^2 \mu_{001,11}^2} \left\{ \begin{array}{l} \frac{m_w(m_w - 1)}{2} [\hat{\mu}_{0,0,22} - \hat{\mu}_{0,0,11}^2] + m_w(m_w - 1)(m_w - 2) \\ [\hat{\mu}_{0,0,211} - \hat{\mu}_{0,0,11}^2] + \frac{m_w(m_w - 1)(m_w - 2)(m_w - 3)}{4} (\hat{\mu}_{0,0,1111} - \hat{\mu}_{0,0,11}^2) \end{array} \right\} \quad (\text{A.3})$$

$$\text{var}(D) = \frac{1}{Nm_z \hat{\mu}_{200}^2} [\hat{\mu}_{400} + (m_z - 1)\hat{\mu}_{22,0,0} - m_z \hat{\mu}_{200}^2] \quad (\text{A.4})$$

$$\text{cov}(A, B) = \frac{1}{Nm_w \hat{\mu}_{101} \hat{\mu}_{011}} [\hat{\mu}_{112} + (m_w - 1)\hat{\mu}_{11(1,1)} - m_w \hat{\mu}_{101} \hat{\mu}_{011}] \quad (\text{A.5})$$

$$\text{cov}(A, C) = \frac{1}{Nm_w \hat{\mu}_{101} \hat{\mu}_{0,0,11}} \{2[\hat{\mu}_{1,0,21} - \hat{\mu}_{101} \hat{\mu}_{0,0,11}] + (m_w - 2)[\hat{\mu}_{1,0,111} - \hat{\mu}_{101} \hat{\mu}_{0,0,11}]\} \quad (\text{A.6})$$

$$\text{cov}(A, D) = \frac{1}{Nm_z \hat{\mu}_{101} \hat{\mu}_{200}} [\hat{\mu}_{301} - \hat{\mu}_{101} \hat{\mu}_{200} + (m_z - 1)(\hat{\mu}_{21,0,1} - \hat{\mu}_{101} \hat{\mu}_{200})] \quad (\text{A.7})$$

$$\text{cov}(B, C) = \frac{1}{Nm_w \hat{\mu}_{011} \hat{\mu}_{0,0,11}} \{2[\hat{\mu}_{1,0,21} - \hat{\mu}_{011} \hat{\mu}_{0,0,11}] + (m_w - 2)[\hat{\mu}_{0,1,111} - \hat{\mu}_{011} \hat{\mu}_{0,0,11}]\} \quad (\text{A.8})$$

$$\text{cov}(B, D) = \frac{1}{N \hat{\mu}_{011} \hat{\mu}_{200}} (\hat{\mu}_{211} - \hat{\mu}_{011} \hat{\mu}_{200}) \quad (\text{A.9})$$

$$\text{cov}(C, D) = \frac{1}{N \hat{\mu}_{0,0,11} \hat{\mu}_{200}} (\hat{\mu}_{2,0,11} - \hat{\mu}_{0,0,11} \hat{\mu}_{200}) \quad (\text{A.10})$$

WEB APPENDIX B: VARIANCES AND COVARIANCES IN EQUATION 4 FOR AN UNBALANCED DESIGN

$$\text{var}(A) = \frac{1}{m_z(2n_2+n_1)^2\hat{\mu}_{101}^2} \left\{ (2n_2+n_1)(\hat{\mu}_{202} - \hat{\mu}_{101}^2) + 2n_2(\hat{\mu}_{2,0,11} - \hat{\mu}_{101}^2) + (m_z-1)(2n_2+n_1)(\hat{\mu}_{11,0,2} - \hat{\mu}_{101}^2) + (m_z-1)(2n_2)(\hat{\mu}_{11,0,11} - \hat{\mu}_{101}^2) \right\} \quad (\text{B.1})$$

$$\text{var}(B) = \frac{1}{m_x(2n_2+n_1)^2\hat{\mu}_{011}^2} \left\{ (2n_2+n_1)(\hat{\mu}_{022} - \hat{\mu}_{011}^2) + 2n_2(\hat{\mu}_{0,2,11} - \hat{\mu}_{011}^2) + (m_x-1)(2n_2+n_1)(\hat{\mu}_{0,11,2} - \hat{\mu}_{011}^2) + (m_x-1)(2n_2)(\hat{\mu}_{0,11,11} - \hat{\mu}_{011}^2) \right\} \quad (\text{B.2})$$

$$\text{var}(C) = \frac{1}{\hat{\mu}_{0,0,11}^2 n_2} (\hat{\mu}_{0,0,22} - \hat{\mu}_{0,0,11}^2) \quad (\text{B.3})$$

Note that in the special case where  $b_i = 2$ , we have

$$\hat{\mu}_{0,0,11} = \sum_{i=1}^{n_2} \frac{(w_{i1} - \bar{w})(w_{i2} - \bar{w})}{n_2}, \hat{\mu}_{0,0,22} = \sum_{i=1}^{n_2} \frac{(w_{i1} - \bar{w})^2(w_{i2} - \bar{w})^2}{n_2}$$

$$\text{var}(D) = \frac{1}{Nm_z\hat{\mu}_{200}^2} [(\hat{\mu}_{400} - \hat{\mu}_{200}^2) + (m_z-1)(\hat{\mu}_{22,0,0} - \hat{\mu}_{200}^2)] \quad (\text{B.4})$$

$$\text{cov}(A, B) = \frac{1}{(2n_2+n_1)\hat{\mu}_{101}\hat{\mu}_{011}} \left[ (\hat{\mu}_{112} - \hat{\mu}_{101}\hat{\mu}_{011}) + \frac{2n_2}{(2n_2+n_1)} (\hat{\mu}_{1,1,11} - \hat{\mu}_{101}\hat{\mu}_{011}) \right] \quad (\text{B.5})$$

$$\text{cov}(A, C) = \frac{2}{(2n_2+n_1)\hat{\mu}_{101}\hat{\mu}_{0,0,11}} (\hat{\mu}_{1,0,21} - \hat{\mu}_{101}\hat{\mu}_{0,0,11}) \quad (\text{B.6})$$

$$\text{cov}(A, D) = \frac{1}{Nm_z\hat{\mu}_{101}\hat{\mu}_{200}} [(\hat{\mu}_{301} - \hat{\mu}_{101}\hat{\mu}_{200}) + (m_z-1)(\hat{\mu}_{21,0,1} - \hat{\mu}_{101}\hat{\mu}_{200})] \quad (\text{B.7})$$

$$\text{cov}(B, C) = \frac{2}{(2n_2+n_1)\hat{\mu}_{011}\hat{\mu}_{0,0,11}} (\hat{\mu}_{0,1,21} - \hat{\mu}_{011}\hat{\mu}_{0,0,11}) \quad (\text{B.8})$$

$$\text{cov}(B, D) = \frac{1}{N\hat{\mu}_{011}\hat{\mu}_{200}} (\hat{\mu}_{211} - \hat{\mu}_{011}\hat{\mu}_{200}) \quad (\text{B.9})$$

$$\text{cov}(C, D) = \frac{1}{N\hat{\mu}_{0,0,11}\hat{\mu}_{200}} (\hat{\mu}_{2,0,11} - \hat{\mu}_{0,0,11}\hat{\mu}_{200}) \quad (\text{B.10})$$

Note that in the special case where  $b_i = 1$  or  $2$ , the

$$\hat{\mu}_{2,0,11} = \sum_{i=1}^{n_2} \sum_{j=1}^{m_z} (z_{ij} - \bar{z})^2 (w_{i1} - \bar{w})(w_{i2} - \bar{w}) / (n_2 m_z)$$

WEB APPENDIX C: COMPONENTS OF  $\text{VAR}[\ln(\hat{\lambda}_{x|z})]$  AS A FUNCTION OF  $\theta$

After some algebra, the variance and covariances provided in Appendix B can be written as a function of  $\theta$  as follows:

$$\text{var}(A) = f_{1A} + f_{2A}\theta \quad (\text{C.1})$$

where

$$\begin{aligned} \theta &= 2n_2/(n_1 + 2n_2) \\ f_{1A} &= \frac{\hat{\mu}_{202} - \hat{\mu}_{101}^2 + (m_z - 1)(\hat{\mu}_{11,0,2} - \hat{\mu}_{101}^2)}{m_z \hat{\mu}_{101}^2 M} \\ f_{2A} &= \frac{\hat{\mu}_{2,0,11} - \hat{\mu}_{101}^2 + (m_z - 1)(\hat{\mu}_{11,0,11} - \hat{\mu}_{101}^2)}{m_z \hat{\mu}_{101}^2 M} \end{aligned}$$

$$\text{var}(B) = f_{1B} + f_{2B}\theta \quad (\text{C.2})$$

where

$$\begin{aligned} f_{1B} &= \frac{\hat{\mu}_{022} - \hat{\mu}_{011}^2 + (m_x - 1)(\hat{\mu}_{0,11,2} - \hat{\mu}_{011}^2)}{m_x \hat{\mu}_{011}^2 M} \\ f_{2B} &= \frac{\hat{\mu}_{0,2,11} - \hat{\mu}_{011}^2 + (m_x - 1)(\hat{\mu}_{0,11,11} - \hat{\mu}_{011}^2)}{m_x \hat{\mu}_{011}^2 M} \end{aligned}$$

$$\text{var}(C) = f_C/\theta \quad (\text{C.3})$$

where

$$f_C = \frac{2(\hat{\mu}_{0,0,22} - \hat{\mu}_{0,0,11}^2)}{\hat{\mu}_{0,0,11}^2 M}$$

$$\text{var}(D) = f_D/(2 - \theta) \quad (\text{C.4})$$

where

$$f_D = \frac{2}{M m_z \hat{\mu}_{200}^2} [(\hat{\mu}_{400} - \hat{\mu}_{200}^2) + (m_z - 1)(\hat{\mu}_{22,0,0} - \hat{\mu}_{200}^2)]$$

$$\text{cov}(A, B) = f_{1,AB} + \theta f_{2,AB} \quad (\text{C.5})$$

where

$$f_{1,AB} = \frac{\hat{\mu}_{112} - \hat{\mu}_{101}\hat{\mu}_{011}}{M\hat{\mu}_{101}\hat{\mu}_{011}}$$

$$f_{2,AB} = \frac{\hat{\mu}_{1,1,11} - \hat{\mu}_{101}\hat{\mu}_{011}}{M\hat{\mu}_{101}\hat{\mu}_{011}}$$

$$\text{cov}(A, C) = f_{AC} \quad (\text{C.6})$$

where

$$f_{AC} = \frac{2(\hat{\mu}_{1,0,21} - \hat{\mu}_{101}\hat{\mu}_{0,0,11})}{M\hat{\mu}_{101}\hat{\mu}_{0,0,11}}$$

$$\text{cov}(A, D) = f_{AD}/(2 - \theta) \quad (\text{C.7})$$

where

$$f_{AD} = \frac{2}{Mm_z\hat{\mu}_{101}\hat{\mu}_{200}} [(\hat{\mu}_{301} - \hat{\mu}_{101}\hat{\mu}_{200}) + (m_z - 1)(\hat{\mu}_{21,0,1} - \hat{\mu}_{101}\hat{\mu}_{200})]$$

$$\text{cov}(B, C) = f_{BC} \quad (\text{C.8})$$

where

$$f_{BC} = \frac{2(\hat{\mu}_{0,1,21} - \hat{\mu}_{011}\hat{\mu}_{0,0,11})}{M\hat{\mu}_{011}\hat{\mu}_{0,0,11}}$$

$$\text{cov}(B, D) = f_{BD}/(2 - \theta) \quad (\text{C.9})$$

where

$$f_{BD} = \frac{2}{M\hat{\mu}_{011}\hat{\mu}_{200}} (\hat{\mu}_{211} - \hat{\mu}_{011}\hat{\mu}_{200})$$

$$\text{cov}(C, D) = f_{CD}/(2 - \theta) \quad (\text{C.10})$$

where

$$f_{CD} = \frac{2}{M\hat{\mu}_{0,0,11}\hat{\mu}_{200}} (\hat{\mu}_{2,0,11} - \hat{\mu}_{0,0,11}\hat{\mu}_{200})$$
